# Supplementary material for: Targeting papain-like protease for broad-spectrum coronavirus inhibition
Source: Protein Cell. 2022 Apr 6;13(12):940–53. doi: 10.1007/s13238-022-00909-3 (PMC8983325; doi:10.1007/s13238-022-00909-3)
Supplement: Supplementary file 1 — Supplementary file1 (PDF 382 kb) [file 13238_2022_909_MOESM1_ESM.pdf]

Supplementary Materials for

**Targeting papain-like protease for broad-spectrum coronaviruses inhibition**

Shuofeng Yuan<sup>1,2†\*</sup>, Xiaopan Gao<sup>3†</sup>, Kaiming Tang<sup>2†</sup>, Jian-Piao Cai<sup>2†</sup>, Menglong Hu<sup>4</sup>, Peng Luo<sup>2</sup>,  
Lei Wen<sup>2</sup>, Zi-Wei Ye<sup>2</sup>, Cuiting Luo<sup>2</sup>, Yaoqiang Huang<sup>2</sup>, Jianli Cao<sup>2</sup>, Ronghui Liang<sup>2</sup>, Zhenzhi  
Qin<sup>2</sup>, Bo Qin<sup>3</sup>, Hin Chu<sup>1,2</sup>, Ren Sun<sup>4,5</sup>, Jasper Fuk-Woo Chan<sup>1,2\*</sup>, Sheng Cui<sup>3\*</sup>, Kwok-Yung  
Yuen<sup>1,2\*</sup>

**This PDF file includes:**

Figs. S1 to S4

**A**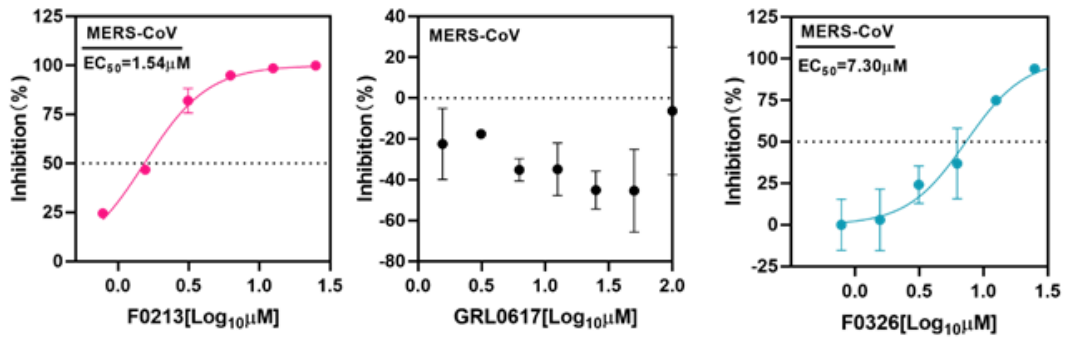**B**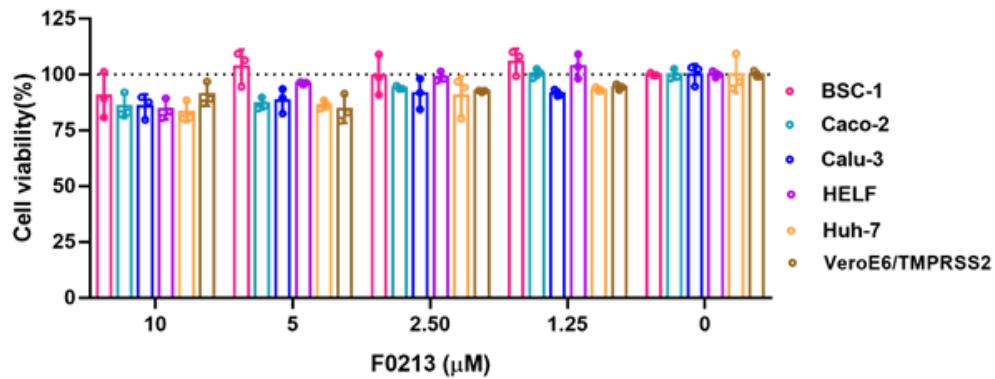

**Figure S1. Anti-MERS-CoV activity and cytotoxicity measurement of F0213.** (A)  $\text{EC}_{50}$  of F0213 or F0326 against MERS-CoV was plotted by plaque reduction assay. GRL0617 showed no inhibition against MERS-CoV. (B) Cell viability of F0213 in different cell lines were determined using CellTiter-Glo assays and in the absence of virus infection. The drug-incubation time in the cytotoxicity assay was consistent with that in the antiviral assays, e.g. at 24h post-treatment for Huh-7 cells; at 48h post-treatment for VeroE6/TMPRSS2 cells, Calu-3 and Caco-2 cells; and at 72h post-treatment for BSC-1 cells and human embryonic lung fibroblasts (HELF), respectively. Data represent mean  $\pm$  SD for  $n=3$  biological replicates. The experiment was repeated twice for confirmation.

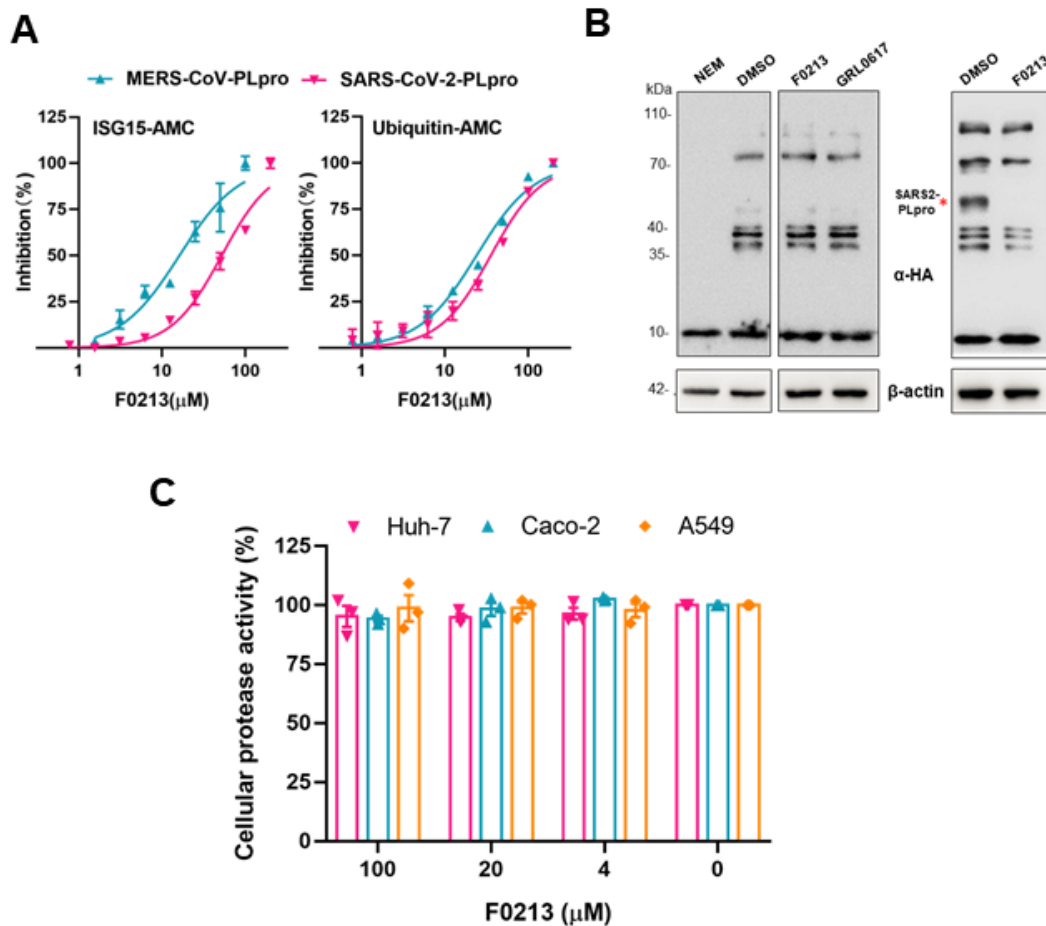

**Figure S2. Specificity analysis of F0213.** (A) F0213 inhibited cleavage of ISG15–AMC and Ubiquitin–AMC that mediated by MERS-CoV PLpro and SARS-CoV-2 PLpro. Data are mean  $\pm$  SD,  $n = 3$  independent experiments. (B) Specificity of F0213 for PLpro over human DUBs. Left panel: An anti-HA Western blot of lysed human Caco-2 cells treated with HA-Ub-VS in the presence of N-ethyl-maleimide (NEM, positive control inhibitor) or GRL0617. Right panel: 0.1  $\mu$ g of SARS2-PLpro was added to Caco-2 cell lysate before covalent modification by HA-Ub-VS, showing that F0213 eliminated PLpro-based modification. (C) Determination of the cellular protease activity in the presence of F0213 (100, 20, 4 and 0  $\mu$ M). Lysates of human liver Huh-7 cells, human colon Caco-2 cells and human lung A549 cells were incubated with a fluorescent-casein substrate before reading, detecting a wide variety of proteases including serine proteases, cysteine proteases and acid proteases. Results were normalized with the readout of 0.1% DMSO (i.e. 0  $\mu$ M) group. Data represent mean  $\pm$  SD for  $n=3$  biological replicates. The experiment was repeated twice for confirmation.

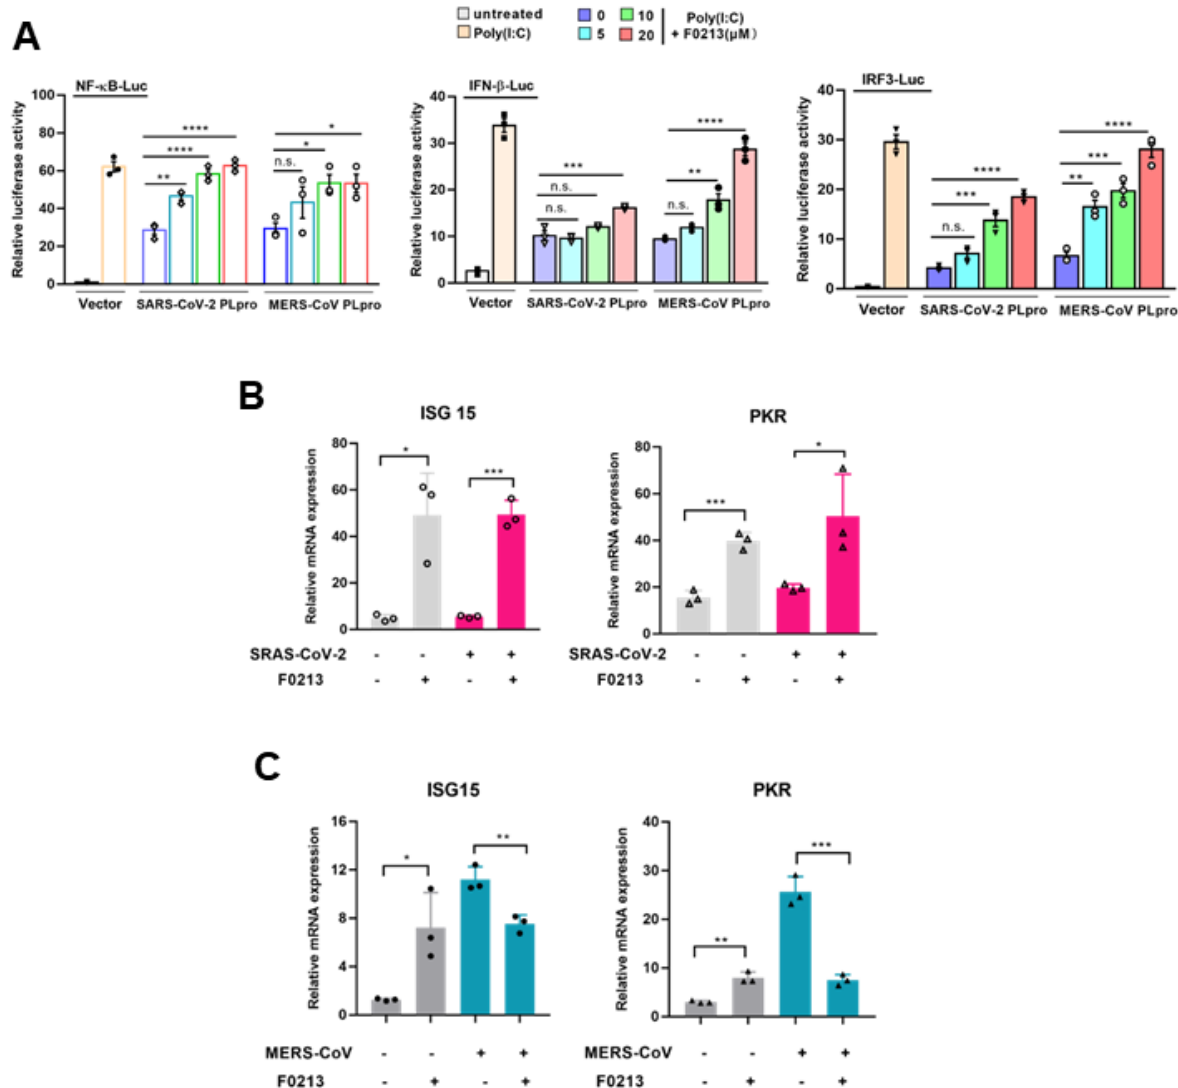

**Figure S3. F0213 antagonizes PLpro-mediated immune dysregulation.** (A) F0213 antagonized PLpro suppression on NF- $\kappa$ B or IFN- $\beta$  or IRF3 expression. Dual-luciferase reporter gene assays were performed in HEK293T cells. Cells were transfected with indicated SARS2-PLpro or MERS-PLpro and treated with poly(I:C) to induce reporter gene expression, respectively. All data are presented as mean  $\pm$ SD. One-way ANOVA for statistical analysis were compared with the DMSO group (0  $\mu$ M). For all statistical analysis, \*\*\*\* $p$ <0.0001, \*\*\* $p$ <0.001, \*\* $p$ <0.01, \* $p$ <0.05 and n.s. non-significant. (B and C) mRNA expression of IFN-responsive host genes in the presence of virus infection and F0213 treatment. RT-qPCR analysis was performed utilizing the cell lysate RNA extraction of Caco-2 (SARS-CoV-2, 0.1MOI, 24hpi) or Huh-7 (MERS-CoV, 0.1 MOI, 24hpi), with or without 10  $\mu$ M F0213 treatment. Data was shown as mean  $\pm$  SD (gene copy per 1000  $\beta$ -actin). Student's T-test. \* $p$ <0.05, \*\* $p$ <0.01 and \*\*\* $p$ <0.001.

**A**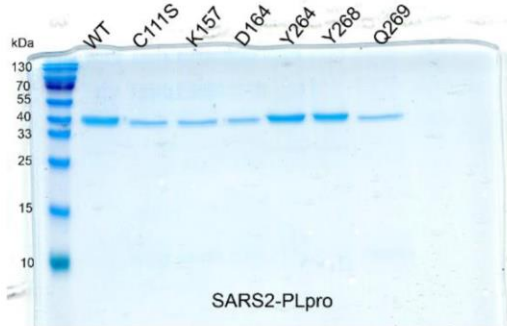**B**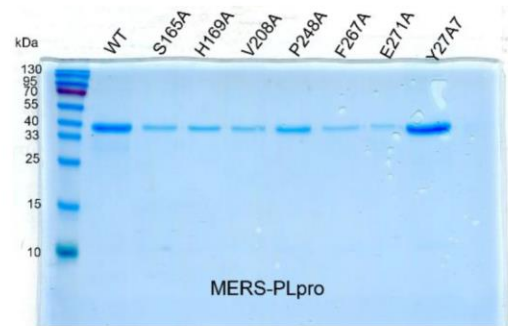

**Figure S4. SARS2-PLpros and MERS-PLpro used in this study.** (A) SDS-PAGE gel image of wild type (WT) and mutant SARS2-PLpro used in this study. (B) SDS-PAGE gel image of WT and mutant MERS-PLpro used in this study.
